# Supplementary material
Source: PubMed Central journal article supplement (PMC3157902)

# Figure S1

## A)

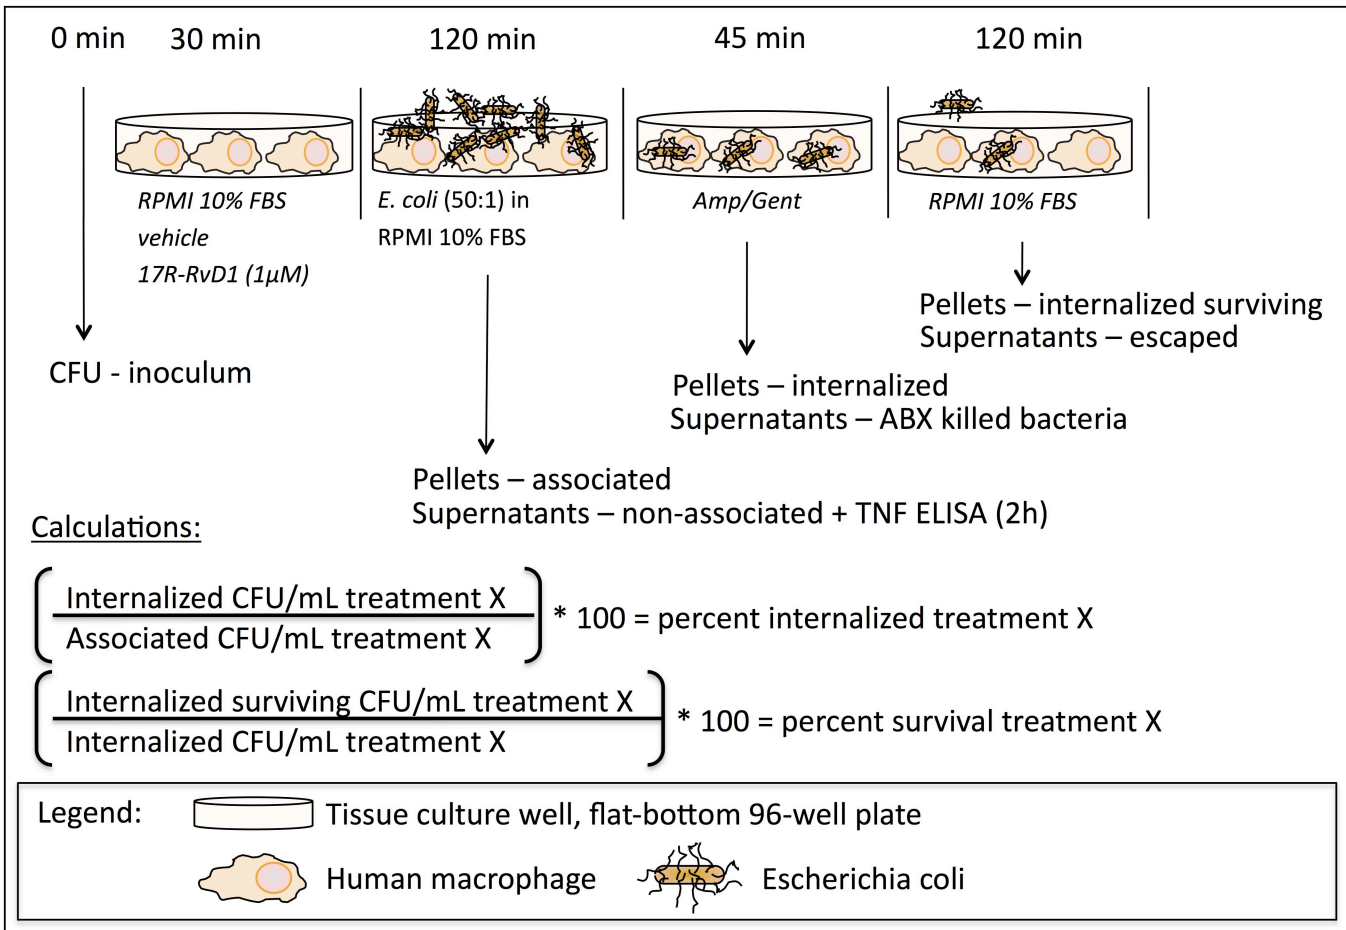

## B)

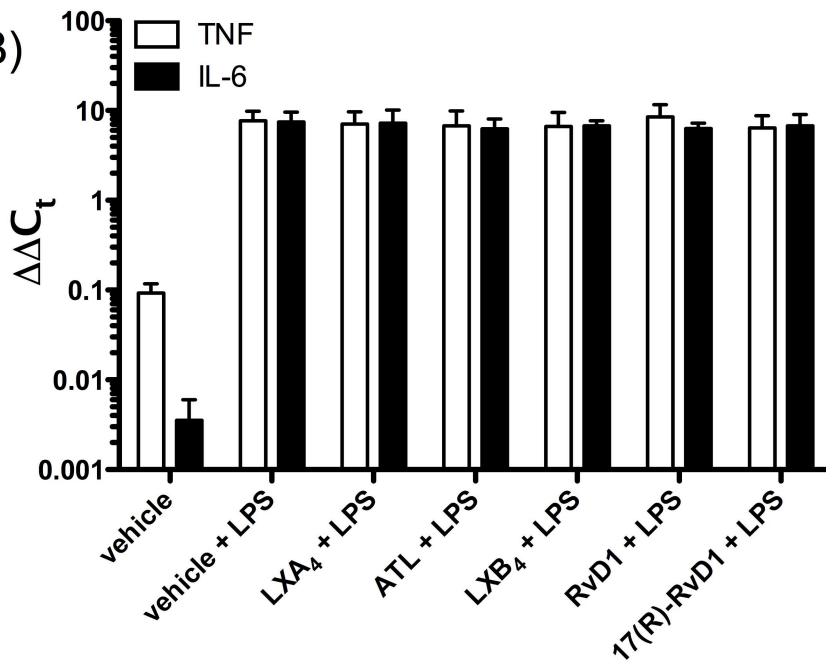

Figure S2

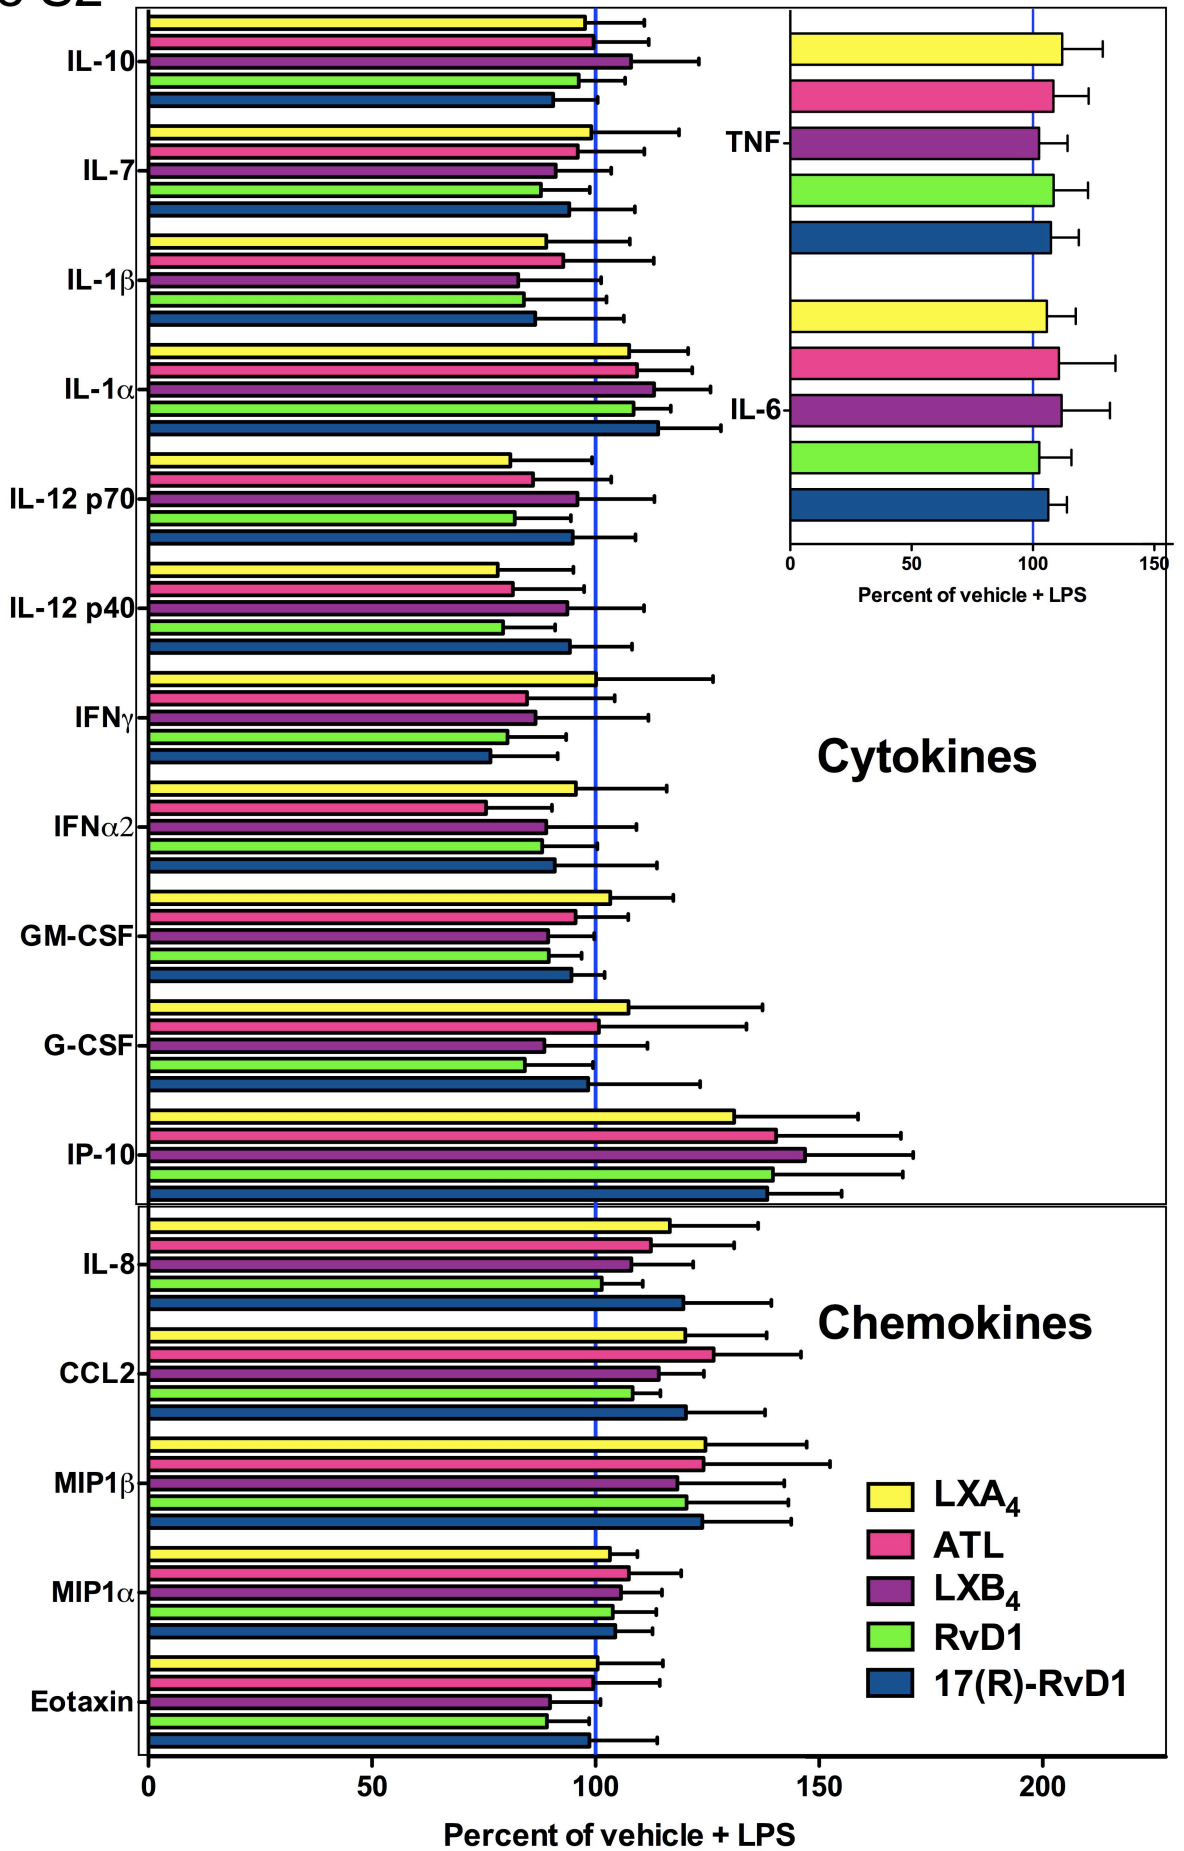

Figure S3

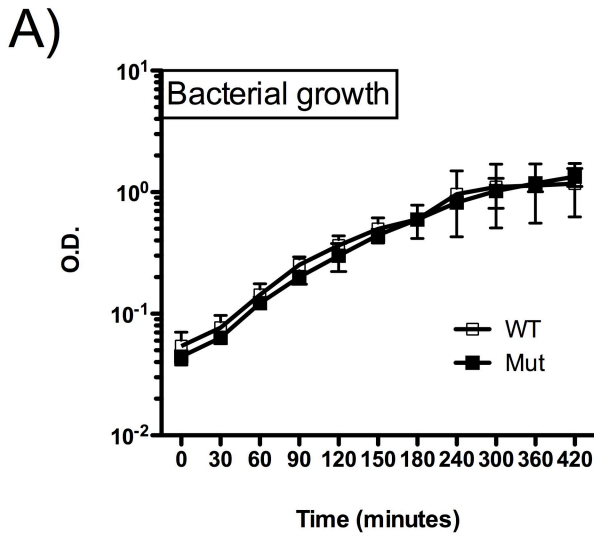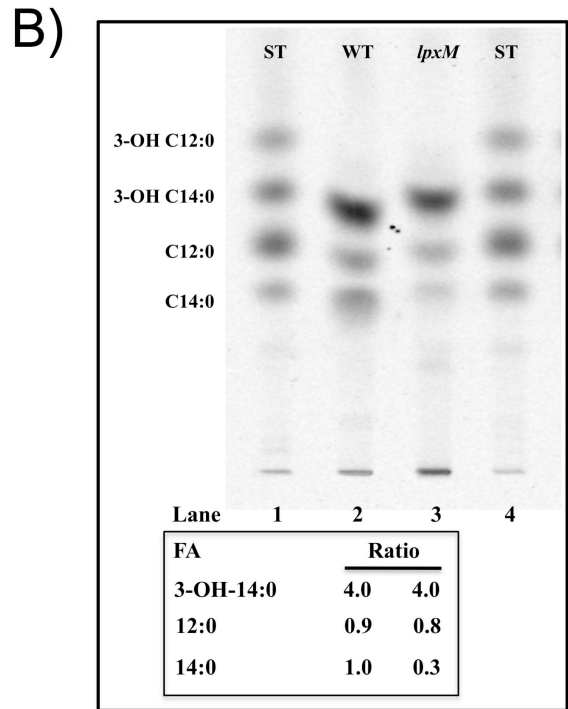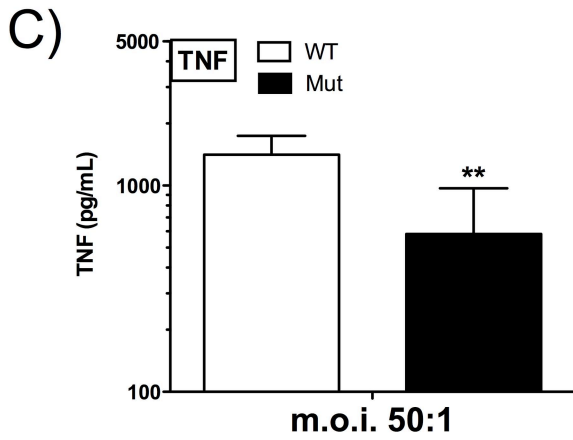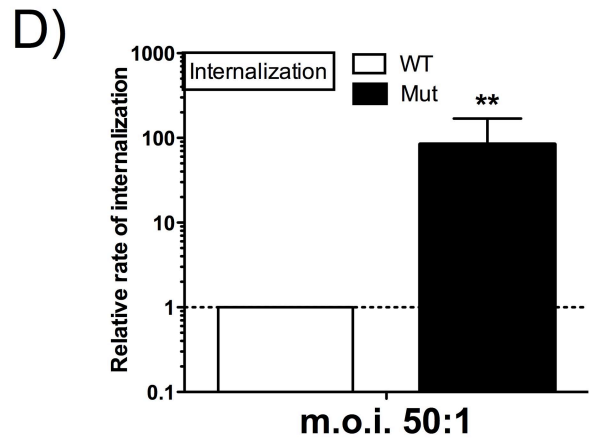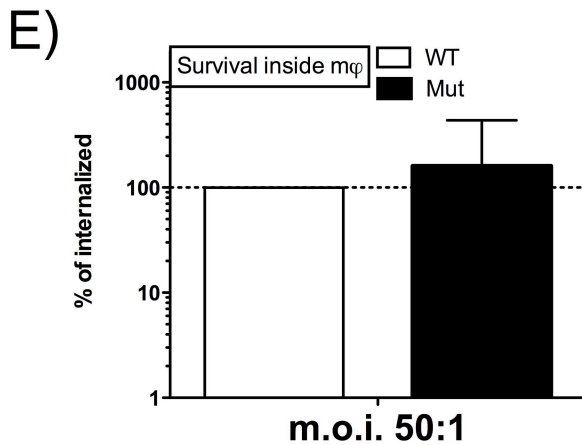

Supplement: supp_jlb.0311145_3MA0311-145_Palmer_suppl_figs.pdf [file supp_jlb.0311145_3MA0311-145_Palmer_suppl_figs.pdf]
